# Supplementary material
Source: bioRxiv or medRxiv preprint supplement (https://www.biorxiv.org/highwire/filestream/110966/field_highwire_adjunct_files/0/365791-1.pdf)
Supplement: Supplementary file [file 365791-1.pdf]

1 **Cicada endosymbionts have tRNAs that are correctly processed despite having genomes**  
2 **that do not encode all of the tRNA processing machinery**

3

4

5 James T. Van Leuven<sup>1</sup>, Meng Mao<sup>2</sup>, Gordon M. Bennett<sup>2</sup>, and John P. McCutcheon<sup>1\*</sup>

6 <sup>1</sup> Division of Biological Sciences, University of Montana, Missoula, Montana 59812.

7 <sup>2</sup> Life and Environmental Sciences, University of California, Merced, California 95343.

8 \* Corresponding author: [john.mccutcheon@umontana.edu](mailto:john.mccutcheon@umontana.edu)

9

10

11

12

13

14

15

16

17

18

19

20

21

22

23

24

25

26 **SUPPLEMENTARY MATERIAL**

27

28 **Supplementary material S1.** Trinotate annotations for all transcripts assembled using Trinity.

29 Available at <https://doi.org/10.6084/m9.figshare.6687089.v1>.

30

31 **Supplementary material S2.** Expression level of gene-level transcripts that were differentially

32 expressed between bacteriome and other cicada tissues. Shown as log<sub>2</sub> fold-change. Available at

33 <https://doi.org/10.6084/m9.figshare.6687089.v1>.

34

35 **Supplementary material S3.** Trinotate annotations for transcripts there are expressed higher in

36 cicada bacteriome tissues than in other cicada tissues. Available at

37 <https://doi.org/10.6084/m9.figshare.6687089.v1>.

38

39

40

41

42

43

44

45

46

47

48

49

50

51

52

53

54

55

56

57

58

59

60

61

62 **FIG S1.** To show a difference between highly expressed and lowly expressed transcripts, RT-  
63 PCR was done on total bacteriome RNA using primers specific for *Hodgkinia* tRNA<sup>Ala</sup> and  
64 *Hodgkinia* tRNA<sup>Cys</sup>. Lanes 1-5: DNA marker, tRNA<sup>Ala</sup> primers, tRNA<sup>Ala</sup> primers no RT control,  
65 tRNA<sup>Cys</sup> primers, tRNA<sup>Cys</sup> primers no RT control.

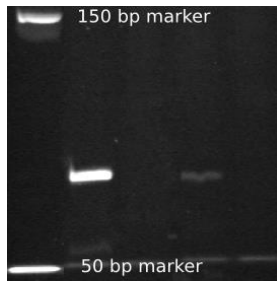

66  
67  
68  
69  
70  
71  
72  
73  
74  
75  
76  
77  
78  
79  
80  
81  
82  
83  
84  
85  
86  
87  
88  
89  
90  
91  
92  
93  
94  
95  
96  
97  
98  
99  
100  
101  
102  
103  
104  
105  
106  
107

108 **FIG S2.** Proposed tmRNA gene in *Hodgkinia* lies between genes for EF-1 alpha and 16S rRNA.  
 109 The direction of transcription is indicated by an arrow. EF-1 alpha and 16S are encoded on the  
 110 sense strand. The tmRNA and *Hodgkinia\_127* are encoded on the anti-sense strand. Two small  
 111 RNA transcripts with high coverage were identified as shown by separate arrows. Read depth  
 112 across the tmRNA gene varies from 0-50,000X. Coordinates of tmRNA features are shown for  
 113 the coding and acceptor RNAs.  
 114  
 115

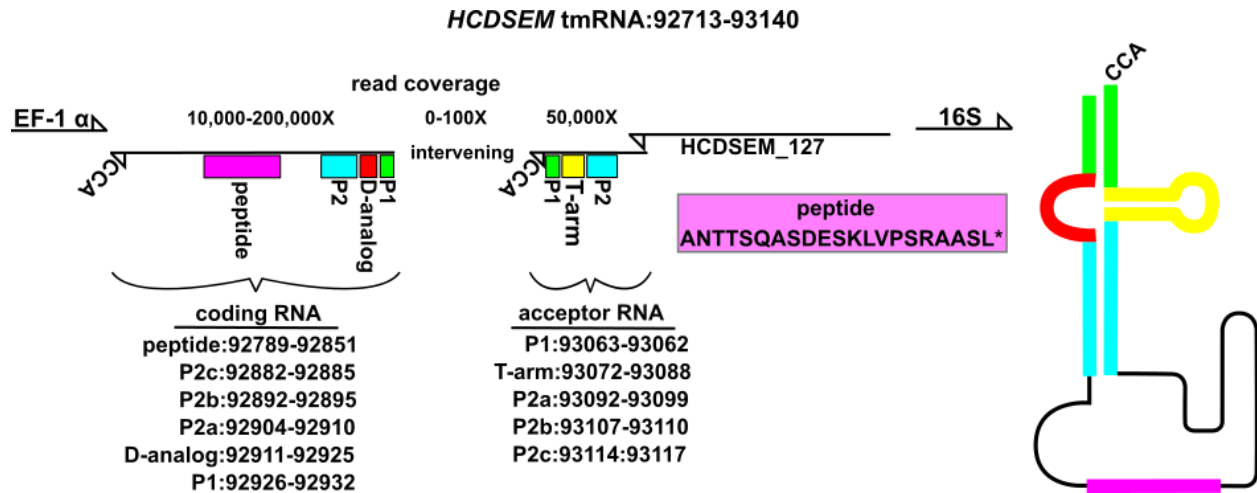

116  
 117  
 118  
 119  
 120  
 121  
 122  
 123  
 124  
 125  
 126  
 127  
 128  
 129  
 130  
 131  
 132  
 133  
 134  
 135  
 136  
 137  
 138  
 139  
 140  
 141  
 142  
 143  
 144  
 145  
 146

147 **Table S1.** tRNA and aaRS genes in the smallest bacterial genomes. Shaded cells indicate that the  
 148 aaRS gene in the left column is missing. <sup>1</sup>aaRS is heteromeric. <sup>2</sup>probable pseudogenes.  
 149

|                   | DICSEM     | TETULN  | TETUND1                 | TETUND2 | MAGTRE  | TPPAVE              | TPPLON  | TPPCIT           |
|-------------------|------------|---------|-------------------------|---------|---------|---------------------|---------|------------------|
| valS              |            | UAC     |                         | UAC     |         | GAC                 | GAC(2)  | <sup>2</sup> CAC |
| ileS              | GAU        | GAU     |                         | GAU     | GAU     | CAU,GAU             | CAU     | GAU              |
| proS              | UGG        | UGG     | UGG                     | UGG     | UGG     | UGG                 |         |                  |
| hisS              | GUG        | GUG     |                         | GUG     |         | GUG                 | GUG     | <sup>2</sup> GUG |
| trpS              | UCA        | UCA     | UCA                     | UCA     | UCA     | CCA                 |         | CCA              |
| metG              | CAU(3)     | CAU(3)  | CAU(2)                  | CAU(2)  | CAU     | CAU(2)              | CAU     | CAU              |
| gltX              | UUC        | UUC     |                         | UUG     |         | UUC                 | UUC     |                  |
| pheS <sup>1</sup> | GAA        | GAA     | GAA                     | GAA     |         | GAA                 | GAA     | GAA              |
| pheT <sup>1</sup> |            |         |                         |         |         |                     |         |                  |
| alaS              | UGC        | UGC     | <sup>2</sup> GGC,UGC(2) | UGC     |         | UGC                 | ACG,CCU | UGC              |
| glyS <sup>1</sup> | UCC,GCC(2) | UCC,GCC | UCC                     | UCC,GCC | UCC,GCC | GCC,UCC             | GCC,UCC |                  |
| glyQ <sup>1</sup> |            |         |                         |         |         |                     |         |                  |
| serS              |            |         |                         |         |         | CGA,GCU,GGA,<br>UGA | ACU     | UGA              |
| asnS              |            |         |                         |         |         | GUU                 | GUU     |                  |
| tryrS             |            |         |                         |         |         | GUA                 |         |                  |
| glnS              | UUG        | UUG     | UUG                     | UUG     | UUG     | UUG                 |         | UUC              |
| lysS              | UUU        | UUU     |                         | UUU     | UUU     | CUU,UUU             | CUU(2)  | CUU(3)           |
| leuS              |            |         |                         |         |         | CAA,UAG             | CAG     |                  |
| argS              |            |         |                         |         |         | ACG,UCU             |         | ACG              |
| aspS              |            | GUC     | GUC                     | GUC     |         | GUC                 | GUC     |                  |
| thrS              |            | UGU,GGU | UGU                     | UGU,GGU |         | CGU,GGU,UGU         |         |                  |
| cysS              | GCA        | GCA     | GCA                     | GCA     | GCA     | GCA                 | GCA     |                  |

150

151

152

153

154

155

156

157

158

159

160

161

162 **Table S2.** Number of reads in the small RNA dataset.

|                                  | Index1 (TAP) | Index2 (untreated) | Index3 (untreated) | Index4 (untreated) |
|----------------------------------|--------------|--------------------|--------------------|--------------------|
| <b>Raw</b>                       | 77,189,680   | 19,096,461         | 47,564,122         | 82,862,668         |
| <b>Quality/length filtered</b>   | 60,627,486   | 12,657,156         | 38,406,203         | 33,486,002         |
| <b>18-90nts</b>                  | 48,521,525   | 10,914,315         | 28,597,483         | 24,618,283         |
| Mapped to <i>Hodgkinia</i>       | 7,484,021    | 1,565,097          | 7,677,511          | 5,903,119          |
| Mapped to <i>Sulcia</i>          | 21,424,135   | 5,094,798          | 9,313,149          | 5,360,814          |
| Mapped to mitochondria           | 261,693      | 83,062             | 57,994             | 77,055             |
| Mapped to <i>Hodgkinia</i> tRNAs | 2,545,941    | 635,453            | 101,749            | 386,447            |
| Mapped to <i>Sulcia</i> tRNAs    | 15,582,990   | 3,489,686          | 1,732,283          | 2,646,973          |
| Mapped to mitochondrial tRNAs    | 338,590      | 104,637            | 60,532             | 120,499            |
| <b>48-90nts</b>                  | 13,855,233   | 3,713,578          | 21,300,447         | 13,163,499         |
| Mapped to <i>Hodgkinia</i>       | 3,706,879    | 24,261             | 7,151,011          | 4,812,614          |
| Mapped to <i>Sulcia</i>          | 4,127,670    | 1,067,020          | 6,835,654          | 2,087,571          |
| Mapped to mitochondria           | 81,003       | 24,261             | 47,331             | 38,985             |
| Mapped to <i>Hodgkinia</i> tRNAs | 13,254       | 4,277              | 17,712             | 39,408             |
| Mapped to <i>Sulcia</i> tRNAs    | 885,324      | 229,957            | 691,271            | 714,197            |
| Mapped to mitochondrial tRNAs    | 57,593       | 18,308             | 47,960             | 51,929             |
| <b>70-100nts</b>                 | 17,917,568   | 3,862,380          | 23,160,979         | 14,622,761         |
| Mapped to <i>Hodgkinia</i>       | 3,263,929    | 554,659            | 6,775,227          | 4,046,344          |
| Mapped to <i>Sulcia</i>          | 9,572,979    | 1,591,156          | 10,075,795         | 6,042,490          |
| Mapped to mitochondria           | 26,122       | 4,996              | 6,320              | 3,718              |
| Mapped to <i>Hodgkinia</i> tRNAs | 5,644        | 1,767              | 8,209              | 8,723              |
| Mapped to <i>Sulcia</i> tRNAs    | 520,386      | 144,229            | 617,538            | 659,736            |
| Mapped to mitochondrial tRNAs    | 674          | 128                | 321                | 558                |

163

164

165

166

167

168

169

170

171

172

173

174

175

176

177

178

179

180 **Table S3.** Primer sequences to amplify tRNAs from total RNA, genomic DNA, and finished  
 181 library preparations.  
 182

|                            | <b>Forward primer 5' to 3'</b> | <b>Reverse primer 5' to 3'</b> |
|----------------------------|--------------------------------|--------------------------------|
| <i>Ala_129_Hodgkinia</i>   | GGGGCTGTAGCTCAATTGG            | TGGAGCTAAGCGGACTCG             |
| <i>Cys_041_Hodgkinia</i>   | GGCTTCGTGGTATAGGGGT            | GGCTTCGCTCAGACTCG              |
| <i>Thr_Sulcia_flanking</i> | CCTGGACAATCTACATGAGCA          | GGTAGAGCATCAGCCTTCCA           |
| Split_tRNA_1               | AGAGTTGCCGGAGGGGTTAAC          | TGGAGAATATCGGATTTGAACCG        |
| Split_tRNA_2               | TATGGCAATAACCAAG               | TGGAGAATATCGGATTTGAACCG        |
| Split_tRNA_3               | GGTGGAGCAGTTGGTAGC             | AGCTAAGCGGACTCGAACCGC          |
| Split_tRNA_4               | GGTGAACGTAGCTCAATTGG           | TGGAGCTAAGCGGACTCG             |
| Split_tRNA_5               | GGATGTAGCGTAGGTTGG             | CGGTACCGGGAATCGAACC            |
| Split_tRNA_6               | CGCGGGGTGGAGCAGTTGG            | CAACGGGGGCAGGAGTCG             |

183

184

185

186

187

188

189

190

191

192

193

194

195

196

197

198

199 **Table S4.** Number of reads mapping to each tRNA gene (plus 15bp flanking sequence) using  
 200 bowtie. The 18-90 SAM file was parsed for reads that map to the tRNA with nearly the perfect  
 201 length and ending in CCA.  
 202

|                | 18-90   | 48-90  | 70-100 | tRNA count |
|----------------|---------|--------|--------|------------|
| SMDSEM_264_Arg | 171822  | 5010   | 4216   | 3522       |
| SMDSEM_216_Gln | 569993  | 13458  | 12207  | 291        |
| SMDSEM_212_Glu | 2345816 | 170866 | 163305 | 120854     |
| SMDSEM_189_Met | 390387  | 33319  | 29288  | 12978      |
| SMDSEM_187_Leu | 80814   | 1747   | 1746   | 542        |
| SMDSEM_170_Met | 110296  | 16461  | 15727  | 8919       |
| SMDSEM_164_Leu | 499915  | 54916  | 679    | 219        |
| SMDSEM_163_Leu | 142900  | 14619  | 14306  | 2513       |
| SMDSEM_152_Ser | 602352  | 96386  | 156066 | 35534      |
| SMDSEM_151_Pro | 1192993 | 2460   | 1995   | 1459       |
| SMDSEM_150_Arg | 4004740 | 56468  | 54731  | 36894      |
| SMDSEM_138_Ser | 232144  | 122460 | 4854   | 2366       |
| SMDSEM_126_Lys | 220987  | 16320  | 14855  | 6793       |
| SMDSEM_125_Asp | 557210  | 56272  | 51479  | 40892      |
| SMDSEM_115_Val | 92904   | 52027  | 50574  | 30918      |
| SMDSEM_091_Leu | 127084  | 28779  | 22692  | 17190      |
| SMDSEM_090_Gly | 50342   | 32083  | 29976  | 4065       |
| SMDSEM_081_Ala | 3605265 | 263269 | 122850 | 91939      |
| SMDSEM_080_Ile | 645895  | 159599 | 147330 | 95551      |
| SMDSEM_070_Thr | 1204147 | 175998 | 132236 | 68762      |
| SMDSEM_069_Tyr | 297423  | 21774  | 4172   | 1938       |
| SMDSEM_068_Gly | 249994  | 24795  | 22514  | 17837      |
| SMDSEM_066_Trp | 226724  | 38543  | 36839  | 30700      |
| SMDSEM_057_His | 272166  | 11285  | 9114   | 7518       |
| SMDSEM_053_Phe | 374054  | 2042   | 1844   | 1203       |
| SMDSEM_030_Cys | 219277  | 97275  | 96060  | 70828      |
| SMDSEM_021_Asn | 4102498 | 540031 | 335843 | 178660     |
| SMDSEM_018_Met | 861790  | 412487 | 404391 | 305158     |
| HCDSEM_189_Met | 306977  | 2522   | 1118   | 831        |
| HCDSEM_187_His | 220501  | 1654   | 373    | 250        |
| HCDSEM_164_Ile | 10009   | 65     | 8      | 3          |
| HCDSEM_163_Gln | 15973   | 103    | 48     | 30         |
| HCDSEM_143_Pro | 52512   | 6800   | 5805   | 9          |
| HCDSEM_142_Glu | 141333  | 37552  | 981    | 946        |
| HCDSEM_132_Met | 498517  | 330    | 108    | 78         |
| HCDSEM_129_Ala | 2254846 | 11053  | 7459   | 5591       |
| HCDSEM_114_Lys | 20565   | 112    | 58     | 13         |
| HCDSEM_108_Gly | 1859    | 60     | 3      | 0          |
| HCDSEM_103_Phe | 3561    | 156    | 4      | 3          |
| HCDSEM_099_Gly | 379     | 171    | 138    | 8          |
| HCDSEM_096_Met | 11795   | 1107   | 83     | 74         |
| HCDSEM_062_Trp | 51683   | 11390  | 7899   | 6754       |
| HCDSEM_061_Gly | 75091   | 388    | 1      | 0          |
| HCDSEM_041_Cys | 3989    | 1188   | 257    | 168        |



|                              |        |        |     |       |
|------------------------------|--------|--------|-----|-------|
| DICSEMmt_Val_c(13936..14031) | 51028  | 6575   | 2   | 295   |
| DICSEMmt_Tyr_c(1625..1720)   | 3553   | 107    | 10  | 5     |
| DICSEMmt_Trp_1509..1602      | 6858   | 75     | 4   | 28    |
| DICSEMmt_Thr_9849..9944      | 17606  | 692    | 51  | 9     |
| DICSEMmt_Ser_6308..6404      | 142889 | 114076 | 108 | 75887 |
| DICSEMmt_Ser_11602..11697    | 6822   | 23     | 41  | 1     |
| DICSEMmt_Pro_c(9915..10007)  | 37229  | 6479   | 117 | 55    |
| DICSEMmt_Phe_c(6433..6528)   | 2035   | 8      | 0   | 1     |
| DICSEMmt_Met_405..500        | 29118  | 1469   | 3   | 160   |
| DICSEMmt_Lys_3969..4068      | 80942  | 3324   | 129 | 83    |
| DICSEMmt_Leu_c(12647..12745) | 23661  | 4271   | 788 | 645   |
| DICSEMmt_Leu_3225..3319      | 15019  | 421    | 8   | 75    |
| DICSEMmt_Ile_266..359        | 36577  | 2388   | 4   | 162   |
| DICSEMmt_Ile_119..211        | 476    | 14     | 0   | 0     |
| DICSEMmt_His_c(8193..8286)   | 1948   | 13     | 0   | 4     |
| DICSEMmt_Gly_5701..5793      | 8489   | 3501   | 85  | 351   |
| DICSEMmt_Glu_6373..6465      | 50668  | 17779  | 7   | 61    |
| DICSEMmt_Gln_c(340..433)     | 34924  | 2491   | 323 | 479   |
| DICSEMmt_Cys_c(1565..1655)   | 25463  | 3374   | 0   | 59    |
| DICSEMmt_Asp_4039..4130      | 20488  | 1068   | 0   | 32    |
| DICSEMmt_Asn_6244..6338      | 17953  | 3333   | 0   | 1370  |
| DICSEMmt_Ala_6114..6207      | 10512  | 4309   | 1   | 396   |

203  
204  
205  
206  
207  
208  
209  
210  
211  
212  
213  
214  
215  
216  
217  
218  
219  
220  
221  
222  
223  
224  
225  
226  
227  
228

229 **Table S5.** No difference found between TAP treated and untreated libraries by Spearman's rank  
 230 correlation and ANOVA, indicating that the 5' of *Hodgkinia* and *Sulcia* tRNAs are properly  
 231 processed. Spearman's rank shows significant correlation between tRNA expression of TAP  
 232 treated and untreated samples. ANOVA shows no significant difference between tRNA relative  
 233 abundance between treated and untreated samples. Relative abundance is the number of reads  
 234 corresponding to each tRNA over the total number of reads assigned to all tRNAs in the sample.  
 235 Categories for "Organism" include *Sulcia*, *Hodgkinia*, mitochondrial (DICSEM), and other  
 236 (unidentified). Significant F values for the ANOVA are F(0.01) = 3.14, F(0.05) = 4.95.  
 237

#### Spearman's Rank

|           | <i>Sulcia</i><br>n (p=0.005<br>critical value) | <i>Hodgkinia</i><br>n (p=0.005<br>critical value) | Rho value <i>Sulcia</i> | Rho value <i>Hodgkinia</i> |
|-----------|------------------------------------------------|---------------------------------------------------|-------------------------|----------------------------|
| 20-100nts | 28 (0.496)                                     | 16 (0.666)                                        | <b>0.932</b>            | <b>0.988</b>               |
| 70-100nts | 28 (0.496)                                     | 16 (0.666)                                        | <b>0.943</b>            | <b>0.962</b>               |

#### ANOVA

|                      | Df | Sum of squares | Mean of squares | F value | Pr (>F) |
|----------------------|----|----------------|-----------------|---------|---------|
| Organism             | 4  | 8.17           | 2.04            | 0.4586  | 0.7658  |
| Amino acid           | 45 | 193.69         | 4.30            | 0.9665  | 0.5423  |
| Anticodon            | 16 | 59.13          | 3.70            | 0.8298  | 0.6482  |
| Organism:Amino acid  | 3  | 4.51           | 1.50            | 0.3374  | 0.7984  |
| Organism:Anticodon   | 35 | 208.40         | 5.95            | 1.3371  | 0.1529  |
| Anticodon:Amino acid | 3  | 5.61           | 1.87            | 0.4197  | 0.7394  |

238

239

240

241

242

243

244

245

246

247

248

249

250

251

252

253

254

255

256

257 **Table S6.** tRNA modifications sorted by site. Those shown are at 2% or greater in frequency. The  
 258 number of reads matching each of the four nucleotides is shown. The genome sequence at that  
 259 position is greyed. <sup>a</sup>Edit occurs on mismatched base-pair in stem region, <sup>b</sup>tRNA secondary  
 260 structure suggests that the gene is pseudogenized, <sup>c</sup>tRNA with high nucleotide similarity exists in  
 261 nuclear genome. 48-90 nucleotide reads used in mapping.  
 262  
 263

|     |                                   | A               | T    | G    | C               |
|-----|-----------------------------------|-----------------|------|------|-----------------|
| N1  | <i>Hodgkinia_164</i>              | 18 <sup>a</sup> | 0    | 10   | 0               |
|     | Mito_Ala_6114-6207                | 137             | 2    | 174  | 0               |
| N2  | <i>Hodgkinia_103</i>              | 0               | 0    | 0    | 8 <sup>a</sup>  |
| N3  | <i>Hodgkinia_099</i>              | 0               | 15   | 0    | 112             |
| N4  | <i>Hodgkinia_061</i>              | 19              | 0    | 2    | 0               |
|     | Mito_Cys_1565-1655                | 0               | 67   | 0    | 48 <sup>a</sup> |
| N6  | Mito_Ile_266-359                  | 281             | 0    | 90   | 2               |
|     | Mito_Met_405-500                  | 39              | 0    | 279  | 1               |
| N7  | <i>Sulcia_151</i>                 | 64              | 4    | 2072 | 5               |
| N9  | <i>Hodgkinia_132</i>              | 3               | 16   | 105  | 3               |
|     | <i>Hodgkinia_142</i>              | 7               | 12   | 1023 | 15              |
|     | Mito_Ile_266-359                  | 7               | 12   | 571  | 16              |
|     | Mito_Gln_340-433                  | 210             | 77   | 38   | 0               |
|     | Mito_Met_405-500                  | 323             | 11   | 3    | 1               |
|     | Mito_Cys_1565-1655                | 96              | 23   | 14   | 0               |
|     | Mito_Lys_3969-4068                | 4               | 26   | 108  | 20              |
|     | Mito_Asp_4039-4130                | 55              | 12   | 18   | 0               |
|     | Mito_Gly_5701-5793                | 656             | 190  | 144  | 1               |
|     | Mito_Ala_6114-6207                | 515             | 147  | 29   | 0               |
|     | Mito_Asn_6244-6338                | 618             | 622  | 1560 | 28              |
|     | Mito_Glu_6373_6465 <sup>c</sup>   | 310             | 60   | 72   | 0               |
|     | Mito_Leu_12647-12745              | 610             | 268  | 113  | 4               |
|     | Mito_Val_13936-14031 <sup>c</sup> | 314             | 179  | 263  | 0               |
| N15 | <i>Hodgkinia_061</i>              | 22              | 0    | 6    | 0               |
|     | <i>Hodgkinia_142</i>              | 139             | 0    | 1122 | 0               |
| N16 | <i>Hodgkinia_164</i>              | 20              | 0    | 27   | 0               |
|     | Mito_Asn_6244-6338                | 0               | 1698 | 1445 | 0               |
| N18 | <i>Hodgkinia_096</i>              | 3               | 0    | 104  | 0               |
| N20 | <i>Hodgkinia_061</i>              | 0               | 10   | 0    | 28              |
|     | <i>Hodgkinia_062</i>              | 108             | 7813 | 4    | 43              |
|     | <i>Hodgkinia_096</i>              | 11              | 67   | 0    | 177             |
|     | <i>Hodgkinia_103</i>              | 0               | 3    | 0    | 51              |
|     | <i>Hodgkinia_108</i>              | 0               | 18   | 0    | 4               |
|     | <i>Hodgkinia_114</i>              | 1               | 7    | 0    | 50              |
|     | <i>Hodgkinia_132</i>              | 7               | 85   | 1    | 57              |
|     | <i>Hodgkinia_142</i>              | 97              | 1258 | 3    | 70              |

|        |                                    |                  |       |        |                   |
|--------|------------------------------------|------------------|-------|--------|-------------------|
|        | <i>Hodgkinia</i> _163              | 2                | 51    | 0      | 18                |
|        | <i>Hodgkinia</i> _187              | 18               | 254   | 1      | 514               |
| N23    | <i>Hodgkinia</i> _189              | 478 <sup>a</sup> | 8     | 1824   | 0                 |
| N26    | <i>Hodgkinia</i> _062              | 190              | 3     | 1      | 8394              |
|        | <i>Hodgkinia</i> _103              | 86               | 0     | 38     | 0                 |
|        | <i>Sulcia</i> _080                 | 102              | 2873  | 147868 | 29                |
|        | <i>Sulcia</i> _091                 | 22               | 471   | 17805  | 6                 |
|        | <i>Sulcia</i> _138                 | 2                | 125   | 4770   | 1                 |
|        | Mito_Gly_5701-5793                 | 1257             | 0     | 2172   | 0                 |
| N27    | <i>Hodgkinia</i> _062              | 12               | 224   | 7915   | 3                 |
|        | <i>Hodgkinia</i> _099              | 0                | 27    | 0      | 116               |
| N34    | <i>Sulcia</i> _126                 | 4                | 15802 | 7      | 407               |
|        | <i>Sulcia</i> _264                 | 4546             | 2     | 380    | 0                 |
| N37    | <i>Hodgkinia</i> _189              | 8                | 14    | 1403   | 981               |
|        | <i>Hodgkinia</i> _132              | 2                | 21    | 287    | 5                 |
|        | <i>Hodgkinia</i> _143              | 63               | 243   | 6143   | 122               |
|        | <i>Sulcia</i> _151                 | 38               | 89    | 2137   | 91                |
|        | <i>Sulcia</i> _187                 | 4                | 15    | 1290   | 12                |
| N43    | <i>Hodgkinia</i> _041              | 0                | 442   | 0      | 371 <sup>a</sup>  |
|        | <i>Hodgkinia</i> _187              | 28               | 1     | 1569   | 1                 |
| N45    | <i>Hodgkinia</i> _061              | 91               | 1     | 264    | 0                 |
|        | <i>Hodgkinia</i> _189              | 470              | 12    | 1902   | 1                 |
|        | Mito_Asp_4039-4130                 | 237              | 0     | 644    | 0                 |
| N46    | <i>Hodgkinia</i> _187              | 27               | 1     | 1571   | 0                 |
| N49    | <i>Hodgkinia</i> _189              | 12               | 468   | 0      | 1899              |
| N57    | <i>Hodgkinia</i> _132              | 2563             | 3     | 3922   | 0                 |
|        | Mito_Gln_340-433                   | 1488             | 0     | 246    | 0                 |
| N58    | <i>Hodgkinia</i> _041              | 424              | 148   | 179    | 0                 |
|        | <i>Hodgkinia</i> _061              | 188              | 26    | 123    | 1                 |
|        | <i>Hodgkinia</i> _103              | 103              | 8     | 19     | 0                 |
|        | <i>Hodgkinia</i> _108              | 33               | 1     | 5      | 0                 |
|        | <i>Hodgkinia</i> _114              | 77               | 1     | 10     | 0                 |
|        | <i>Hodgkinia</i> _163              | 40               | 26    | 30     | 0                 |
|        | <i>Hodgkinia</i> _187              | 1501             | 22    | 29     | 0                 |
|        | <i>Hodgkinia</i> _189              | 2158             | 42    | 17     | 0                 |
|        | <i>Sulcia</i> _189                 | 29461            | 671   | 17     | 2                 |
| N61    | Mito_Asn_6244-6338                 | 1811             | 1     | 1362   | 0                 |
| N62    | <i>Hodgkinia</i> _189 <sup>b</sup> | 21 <sup>a</sup>  | 0     | 115    | 0                 |
|        | <i>Hodgkinia</i> _108              | 36               | 0     | 2      | 0                 |
| N67    | Mito_Gln_340-433                   | 0                | 222   | 0      | 1479              |
|        | Mito_Leu_12647-12745               | 1772             | 2085  | 2      | 2                 |
| N68    | <i>Hodgkinia</i> _062              | 2                | 842   | 1      | 7800 <sup>a</sup> |
| T-loop | Mito_Met_405-500                   | 580              | 570   | 0      | 0                 |
|        | Mito_Cys_1565-1655                 | 0                | 267   | 0      | 1305              |

|        |                                   |      |      |   |     |
|--------|-----------------------------------|------|------|---|-----|
|        | Mito_Cys_1565-1655                | 1303 | 266  | 2 | 0   |
|        | Mito_Asp_4039-4130                | 643  | 0    | 0 | 242 |
| D-loop | Mito_Val_13936-14031 <sup>c</sup> | 0    | 5108 | 1 | 588 |

264  
265  
266  
267  
268  
269  
270  
271  
272  
273  
274  
275  
276  
277  
278  
279  
280  
281  
282  
283  
284  
285  
286  
287  
288  
289  
290  
291  
292  
293  
294  
295  
296  
297  
298  
299  
300  
301  
302  
303  
304  
305  
306

307 **Table S7.** List of transcripts that are involved in tRNA maturation and are up regulated in cicada  
 308 bacteriocytes. Genes identified by edgeR ( $P < 0.05$ ) and those highly expressed in bacteriocytes  
 309 ( $P = NS$ ) are listed. Gene expression values are given in CPM.  
 310

| Trinity name       | Trinotate name                                                            | 1b    | 1o   | 2b    | 2o  | 3b    | 3o  | 4b   | 4o  | pvalue |
|--------------------|---------------------------------------------------------------------------|-------|------|-------|-----|-------|-----|------|-----|--------|
| DN38936_c1_g1      | Arginine--tRNA ligase, cytoplasmic                                        | 129.9 | 5.5  | 6.2   | 1.3 | 34.3  | 3.4 | 20.8 | 5.0 | NS     |
| DN38565_c0_g1      | Cysteine--tRNA ligase, cytoplasmic                                        | 9.1   | 1.7  | 3.9   | 0.0 | 1.8   | 1.2 | 4.0  | 0.6 | NS     |
| DN46824_c3_g1      | Cysteine--tRNA ligase,<br>mitochondrial                                   | 51.7  | 0.9  | 3.6   | 0.7 | 9.0   | 1.7 | 8.2  | 2.1 | NS     |
| DN51624_c0_g1      | Serine--tRNA ligase, cytoplasmic                                          | 54.9  | 3.7  | 1.2   | 0.3 | 2.1   | 2.7 | 2.7  | 2.7 | NS     |
| DN36332_c0_g2      | Putative tRNA pseudouridine<br>synthase Pus10                             | 68.4  | 3.2  | 4.4   | 3.3 | 10.8  | 7.1 | 17.5 | 4.9 | NS     |
| DN38950_c0_g1      | tRNA 2'-phosphotransferase 1                                              | 118.9 | 13.3 | 5.9   | 0.3 | 19.9  | 7.6 | 20.5 | 6.1 | NS     |
| DN40306_c0_g1      | tRNA (guanine(10)-N2)-<br>methyltransferase homolog                       | 15.1  | 1.1  | 0.6   | 2.6 | 2.3   | 1.4 | 6.2  | 1.8 | NS     |
| DN43098_c0_g1      | Methionyl-tRNA formyltransferase,<br>mitochondrial                        | 15.5  | 0.2  | 0.9   | 0.0 | 1.5   | 0.1 | 1.4  | 0.1 | NS     |
| DN47148_c0_g2      | Queuine tRNA-ribosyltransferase<br>subunit QTRTD1 homolog                 | 60.7  | 3.2  | 1.8   | 0.3 | 4.4   | 0.6 | 11.3 | 1.7 | NS     |
| DN34313_c0_g1      | D-tyrosyl-tRNA(Tyr) deacylase 1                                           | 22.4  | 0.0  | 3.6   | 0.0 | 28.8  | 0.0 | 19.5 | 0.0 | 0.001  |
| DN41591_c0_g1      | tRNA modification GTPase MnmE                                             | 3.3   | 0.0  | 119.8 | 0.0 | 0.7   | 0.1 | 6.3  | 0.0 | 0.012  |
| DN45267_c0_g1      | D-tyrosyl-tRNA(Tyr) deacylase 1                                           | 28.6  | 0.0  | 17.8  | 1.0 | 121.0 | 1.4 | 21.8 | 0.5 | 0.043  |
| DN45267_c2_g1      | D-tyrosyl-tRNA(Tyr) deacylase 1                                           | 20.7  | 0.0  | 4.2   | 0.0 | 48.3  | 0.0 | 8.7  | 0.0 | 0.002  |
| DN45267_c2_g2      | D-tyrosyl-tRNA(Tyr) deacylase 1                                           | 9.7   | 0.0  | 0.0   | 0.0 | 3.2   | 0.0 | 3.9  | 0.0 | 0.043  |
| DN47407_c0_g1      | tRNA (uracil(54)-C(5))-<br>methyltransferase homolog-B                    | 160.2 | 0.3  | 4.4   | 0.3 | 1.6   | 0.5 | 21.7 | 0.8 | 0.031  |
| DN48812_c5_g1<br>4 | D-tyrosyl-tRNA(Tyr) deacylase                                             | 31.0  | 0.0  | 0.6   | 0.0 | 13.6  | 0.0 | 4.2  | 0.0 | 0.006  |
| DN48899_c1_g2      | Aminoacyl tRNA synthase complex-<br>interacting multifunctional protein 1 | 10.2  | 0.0  | 0.0   | 0.0 | 2.9   | 0.0 | 2.8  | 0.0 | 0.049  |
| DN52199_c1_g2      | Aminoacyl tRNA synthase complex-<br>interacting multifunctional protein 1 | 93.4  | 0.1  | 1.2   | 0.0 | 13.0  | 0.2 | 12.6 | 0.0 | 0.011  |

311  
 312  
 313  
 314  
 315  
 316  
 317  
 318  
 319  
 320  
 321  
 322  
 323  
 324  
 325  
 326  
 327  
 328  
 329

330 **Table S8** Horizontally transferred genes identified in the cicada transcriptome. Gene expression  
 331 values are given in CPM.  
 332

| Trinity       | Gene          | Product                   | 1b  | 1o | 2b  | 2o | 3b  | 3o  | 4b  | 4o  |
|---------------|---------------|---------------------------|-----|----|-----|----|-----|-----|-----|-----|
| DN89433_c0_g1 | N/A           | AAA-ATPase                | 0.2 | 0  | 0   | 0  | 0   | 0   | 0.1 | 0   |
| DN22517_c1_g1 | <i>pel</i>    | Pectin lyase              | 0   | 0  | 0   | 0  | 0   | 1.4 | 0   | 1.4 |
| DN65002_c0_g1 | <i>yebC-1</i> | Transcription regulator   | 9.9 | 0  | 0.4 | 0  | 9.9 | 0   | 2.6 | 0   |
| DN39720_c1_g1 | <i>yebC-2</i> |                           | 12  | 0  | 0.4 | 0  | 1.5 | 0   | 5.4 | 0   |
| DN56768_c0_g1 | <i>frr</i>    | Ribosome recycling factor | 0   | 0  | 0   | 0  | 3.6 | 4.1 | 0   | 0   |

333  
 334  
 335  
 336  
 337  
 338  
 339  
 340  
 341  
 342  
 343  
 344  
 345  
 346  
 347  
 348  
 349  
 350  
 351  
 352  
 353  
 354  
 355  
 356  
 357  
 358  
 359  
 360  
 361  
 362  
 363  
 364  
 365  
 366  
 367  
 368  
 369

370 **Table S9.** Number of differentially expressed tRNA genes encoded on the *Hodgkinia*, *Sulcia*, and  
 371 the cicada mitochondria genomes by edgeR analysis (66 total genes). The analysis was  
 372 performed for all four small RNA samples and for three read size ranges. Index1: TAP treated  
 373 2010 sample, index2: 2010 sample, index3: 2012 sample, index4: 2012 sample.  
 374

|        |    | 70-100 nt |   |   |  |
|--------|----|-----------|---|---|--|
| index1 | 0  |           |   |   |  |
| index2 | 0  | 0         |   |   |  |
| index3 | 9  | 10        | 0 |   |  |
| index4 | 8  | 5         | 3 | 0 |  |
|        |    | 48-90 nt  |   |   |  |
| index1 | 0  |           |   |   |  |
| index2 | 0  | 0         |   |   |  |
| index3 | 18 | 16        | 0 |   |  |
| index4 | 11 | 9         | 4 | 0 |  |
|        |    | 18-90 nt  |   |   |  |
| index1 | 0  |           |   |   |  |
| index2 | 0  | 0         |   |   |  |
| index3 | 20 | 20        | 0 |   |  |
| index4 | 11 | 11        | 3 | 0 |  |

375

376

377

378
